# Supplementary material
Source: PubMed Central journal article supplement (PMC4060653)
Supplement: 1313222111_pnas.201313222SI.pdf [file 1313222111_pnas.201313222SI.pdf]

# Supporting Information

Czajkowski et al. 10.1073/pnas.1313222111

## SI Methods

**Histology.** After completion of behavioral experiments, mice were perfused with 4% (wt/vol) paraformaldehyde. Brains were sliced coronally into 40- $\mu\text{m}$  sections. For experiments involving infusion, cannula placement was confirmed. For CREB experiments, the extent of the viral infection was determined by GFP fluorescence. Only those mice that showed bilateral expression

of GFP in the target region (RSC) were included in statistical analysis. Quantitative analysis of infection level was performed using ImageJ. The total number of GFP positive cells was counted bilaterally with a fixed sample window ( $0.04\text{ mm}^2$ ) in six sections separated by 0.32 mm (total anteroposterior length: 1.6 mm, centered on the cannula trace). To assess the number of nuclei in the areas counted, the slices were counterstained using DAPI.

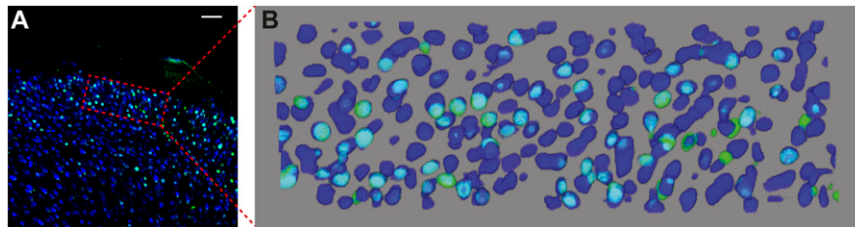

**Fig. S1.** Cells expressing reporter gene FosGFP in the dysgranular retrosplenial cortex (RSC-d). Immediately after the completion of the last session (SMP) of the *in vivo* experiment, brains were fixed, sliced, and labeled with anti-neuronal nuclei (NeuN) antibody to visualize neuronal nuclei together with FosGFP-positive cells to estimate the percentage of activated cells. (A) Single optical slice of the dysgranular RSC area. Green, FosGFP-expressing cells; blue, NeuN. (B) Three-dimensional reconstruction of area indicated in A. Neuronal nuclei imaged in each channel were identified and counted to obtain an estimate of percentage of FosGFP-expressing cells. NeuN-positive: 213 cells. FosGFP-positive: 101 cells. Fraction of FosGFP positive cells: 0.47.

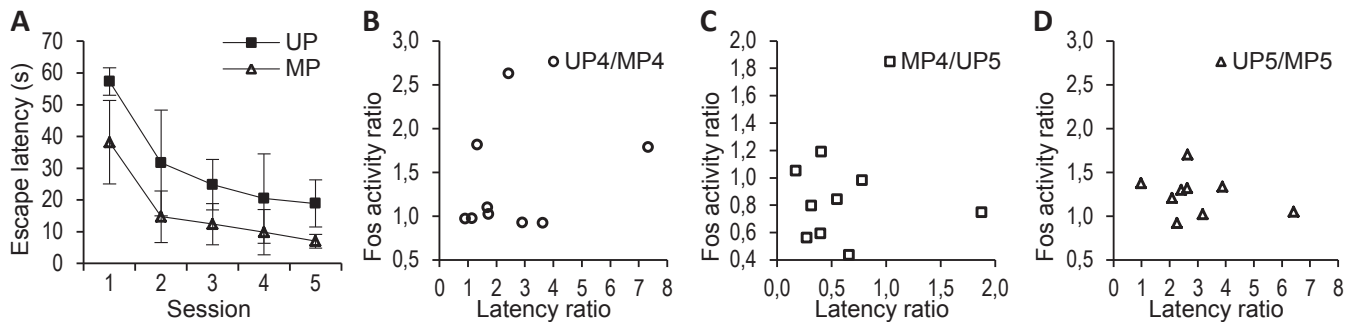

**Fig. S2.** Fos activity does not correlate with performance in Morris water maze. (A) Learning curves for unmarked platform (UP) (filled squares) and marked platform (MP) (open triangles). (B–D) Differences in FosGFP expression (measured as activity ratio) for individual animals (markers 1–8) show no correlation with differences in behavioral performance (measured as completion time ratio). (B)  $R^2 = 0.063$ . (C)  $R^2 = 0.015$ . (D)  $R^2 = 0.085$ .

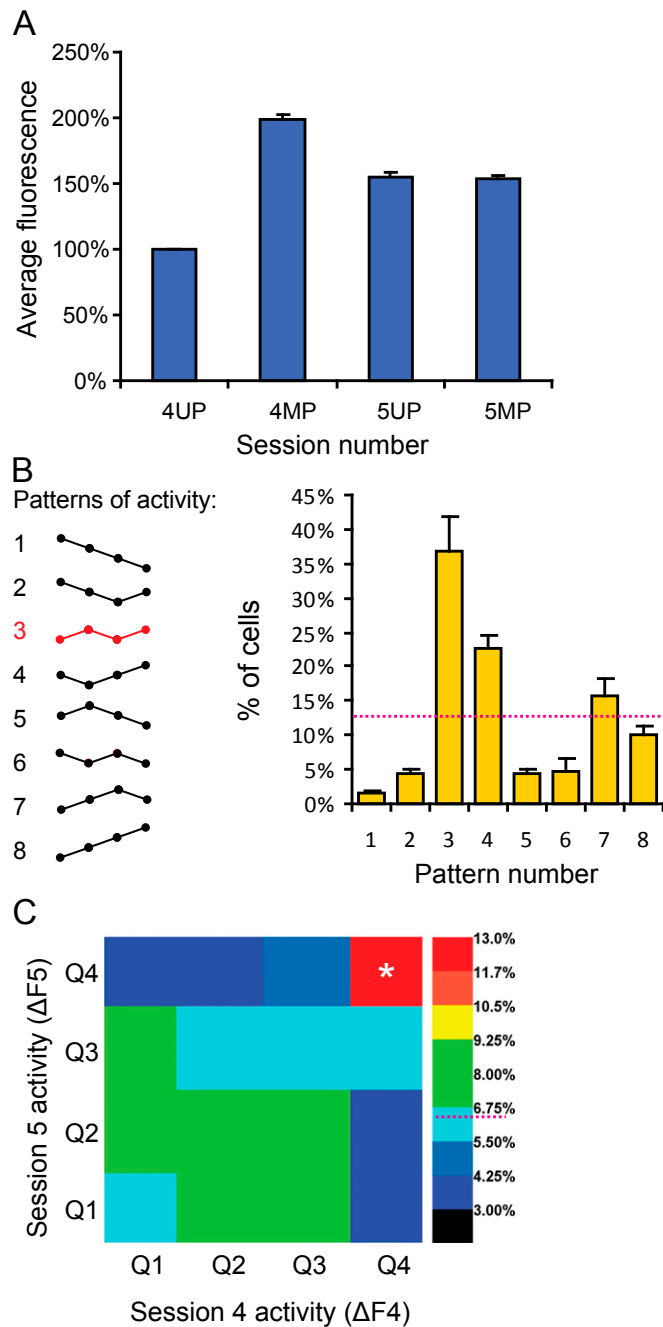

**Fig. 53.** Two-photon in vivo imaging of FosGFP reporter in the somatosensory cortex (SSC) during water maze. **(A)** Summary of FosGFP activation in the SSC after alternating UP and MP sessions. MP session 4 evoked the highest expression of the reporter. **(B)** Summary of activation changes displayed by SSC cells during the imaging experiment. Each cell could follow one of eight patterns of response. Approximately 35% of the cells show higher FosGFP level in both MP sessions and lower in the UP sessions (pattern 3, marked in red). **(C)** High Fos level in MP4 is a good predictor of activity in MP5. Cells that follow pattern 3 in *B* were divided into four quartiles according to the  $\Delta F4$  and  $\Delta F5$  values and a colocalization matrix was created. Cells in Q4 that show lowest  $\Delta F4$  (high 4MP with low 4UP) are twice as likely as chance to remain in the Q4 also for session 5. Matrix element [4,4] contains 12.28% of the entire population, statistically different from random distribution (\*Z score = 4.30,  $P < 0.001$ ).

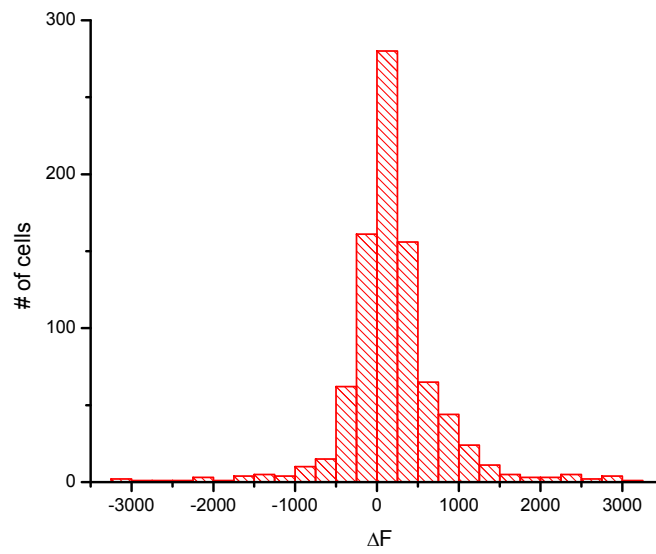

**Fig. S4.** Distribution of  $\Delta F$  values in a typical session. No separate peak of FosGFP-expressing cells was detected.



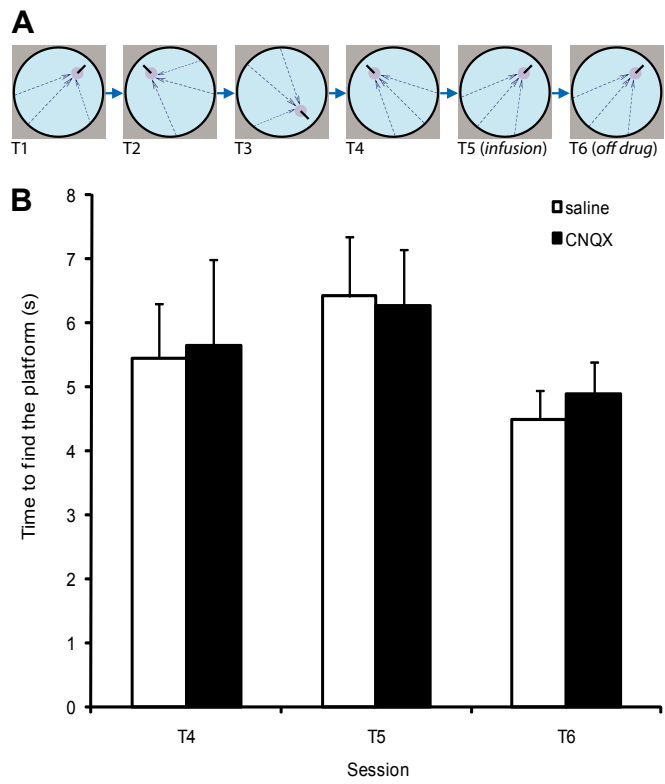

**Fig. 56.** RSC inactivation during visible Morris water maze. (A) Experimental design. Gray circles represent alternating platform location; dashed arrows show release points in each session; black line represents intramaze marker of the platform position. (B) Average time to reach the visible platform in the last three sessions.
